# Supplementary material
Source: publisher figshare collection journal article supplement (https://sage.figshare.com/ndownloader/files/13569170)
Supplement: Supplementary file [file 13569170]

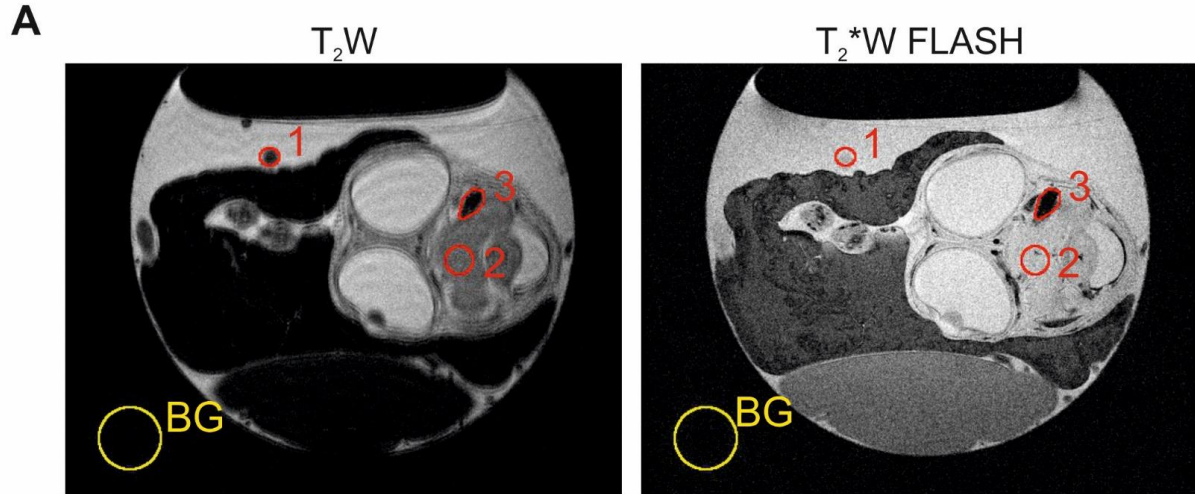

**B**

|               |   | $T_2W$ |       |      | $T_2^*W$ FLASH |       |      |
|---------------|---|--------|-------|------|----------------|-------|------|
|               |   | Signal | SNR   | CNR  | Signal         | SNR   | CNR  |
| $S_{BG}$      |   | 13.89  |       |      | 23.49          |       |      |
| $\delta_{BG}$ |   | 78.23  |       |      | 13.04          |       |      |
| $S_{ROI}$     | 1 | 95.01  | 10.74 |      | 188.65         | 52.24 |      |
|               | 2 | 104.24 | 11.79 | 0.06 | 185.54         | 51.38 | 0.07 |
|               | 3 | 53.60  | 6.06  | 0.11 | 50.06          | 13.86 | 0.28 |

**Supplemental Figure 1**

**A)** Representative sagittal  $T_2W$  and  $T_2^*W$  FLASH MR images of E14 chick embryo *in ovo* as shown in Figure 3A. Regions of interest (ROI) are indicated as follows: Background (BG) = yellow circle, ROI 1 = extraembryonic blood vessel, labelled with red circle, ROI2 = part of the chick embryo brain, labelled with red circle, ROI3 = area containing MPIO labelled cells located within the brain of the chick embryo surrounded by red outline. **B)** Table of signal intensity of background (SBG) as well as the 3 ROIs displayed in A, standard deviation of the background ( $\delta_{BG}$ ), signal to noise ratio (SNR) and contrast to noise ratio (CNR). Signal intensity (mean grey value) was measured in the ROI. SNR and CNR were calculated using following formulas  $SNR = S_{ROI}/\sqrt{\delta_{BG}}$ ,  $CNR = (S_{ROI3}/S_{ROI2} \text{ or } S_{ROI3})/\sqrt{\delta_{BG}}$ .
